# Supplementary material for: Doublecortin-like kinase 1 expression associates with breast cancer with neuroendocrine differentiation
Source: PubMed Central journal article supplement (PMC4811473; doi:10.18632/oncotarget.6386), 2015-11-25
Supplement: oncotarget-07-1464-s001.pdf [file oncotarget-07-1464-s001.pdf]

## Doublecortin-like kinase 1 expression associates with breast cancer with neuroendocrine differentiation

### Supplementary Material

Supplementary Table S1 Multivariate analysis on the association with DCKL1 expression

|      | OR    | p-value | 95% CI |       |
|------|-------|---------|--------|-------|
|      |       |         | Lower  | Upper |
| LVI  | 0.590 | 0.001   | 0.427  | 0.817 |
| Ki67 | 0.777 | 0.095   | 0.577  | 1.045 |
| ER   | 2.316 | <0.001  | 1.648  | 3.255 |
| CG   | 1.611 | 0.019   | 1.080  | 2.401 |
| SYN  | 1.655 | <0.001  | 1.298  | 2.110 |

Only the last step of backward analysis was shown.

Factors included: age, grade, LVI, FF, necrosis, pN stage, Ki67, ER, PR, HER2, CK5/6, c-kit, AR, p-cadherin, CG and SYN

Supplementary Table S2 Correlation of DCLK1 expression with other biomarkers, age and tumor size (as continuous variables) in overall cohort and IBC-NED

|            |         | Overall          | IBC-NED          |
|------------|---------|------------------|------------------|
| Age        | $r_s$   | 0.041            | 0.213            |
|            | p-value | 0.167            | <b>0.013</b>     |
|            | N       | 1133             | 135              |
| Tumor size | $r_s$   | -0.064           | -0.119           |
|            | p-value | <b>0.033</b>     | 0.174            |
|            | N       | 1118             | 132              |
| ER         | $r_s$   | 0.225            | 0.306            |
|            | p-value | <b>&lt;0.001</b> | <b>&lt;0.001</b> |
|            | N       | 1127             | 135              |
| PR         | $r_s$   | 0.236            | 0.423            |
|            | p-value | <b>&lt;0.001</b> | <b>&lt;0.001</b> |
|            | N       | 1121             | 135              |
| AR         | $r_s$   | 0.074            | 0.061            |
|            | p-value | <b>0.014</b>     | 0.481            |
|            | N       | 1111             | 134              |
| EGFR       | $r_s$   | -0.012           | 0.054            |
|            | p-value | 0.700            | 0.536            |
|            | N       | 1117             | 135              |
| HER2       | $r_s$   | -0.047           | -0.208           |
|            | p-value | 0.114            | <b>0.016</b>     |
|            | N       | 1127             | 134              |
| Ki67       | $r_s$   | -0.076           | -0.215           |
|            | p-value | <b>0.011</b>     | <b>0.012</b>     |
|            | N       | 1119             | 135              |
| c-KIT      | $r_s$   | -0.046           | -0.059           |
|            | p-value | 0.129            | 0.495            |
|            | N       | 1114             | 135              |
| P63        | $r_s$   | -0.026           | -0.191           |
|            | p-value | 0.388            | <b>0.028</b>     |
|            | N       | 1116             | 133              |
| CK5/6      | $r_s$   | -0.072           | 0.066            |
|            | p-value | <b>0.015</b>     | 0.448            |
|            | N       | 1116             | 134              |
| CK14       | $r_s$   | -0.025           | 0.028            |
|            | p-value | 0.396            | 0.747            |
|            | N       | 1118             | 135              |
| SYN        | $r_s$   | 0.252            | 0.412            |
|            | p-value | <b>&lt;0.001</b> | <b>&lt;0.001</b> |
|            | N       | 1117             | 135              |
| CG         | $r_s$   | 0.202            | 0.266            |
|            | p-value | <b>&lt;0.001</b> | <b>0.002</b>     |
|            | N       | 1117             | 135              |
| p-Cadherin | $r_s$   | -0.183           | -0.177           |
|            | p-value | <b>&lt;0.001</b> | <b>0.041</b>     |
|            | N       | 1102             | 134              |
| Vimentin   | $r_s$   | -0.004           | 0.088            |
|            | p-value | 0.886            | 0.315            |
|            | N       | 1108             | 134              |
| CD44       | $r_s$   | 0.043            | -0.086           |
|            | p-value | 0.321            | 0.542            |
|            | N       | 524              | 53               |
| ALDH       | $r_s$   | 0.013            | 0.081            |

|      |                |       |        |
|------|----------------|-------|--------|
|      | p-value        | 0.766 | 0.562  |
|      | N              | 527   | 53     |
| SOX2 | r <sub>s</sub> | 0.014 | -0.132 |
|      | p-value        | 0.741 | 0.346  |
|      | N              | 527   | 53     |

Supplementary Table S3 Association with IBC-NED (cutoff of 1% and 50%) with clinico-pathological factors and biomarker

|            |          | NED (1% cutoff) |          |         | NED (50% cutoff) |          |         |
|------------|----------|-----------------|----------|---------|------------------|----------|---------|
|            |          | Absence         | Presence | p-value | Absence          | Presence | p-value |
| Grade      | 1        | 147             | 16       | 0.401   | 155              | 11       | 0.003   |
|            | 2        | 382             | 69       |         | 422              | 31       |         |
|            | 3        | 446             | 50       |         | 486              | 12       |         |
| FF         | Absence  | 714             | 109      | 0.065   | 782              | 46       | 0.051   |
|            | Presence | 243             | 24       |         | 261              | 7        |         |
| necrosis   | Absence  | 749             | 115      | 0.028   | 822              | 48       | 0.013   |
|            | Presence | 191             | 16       |         | 204              | 3        |         |
| EIC        | Absence  | 766             | 110      | 0.382   | 834              | 45       | 0.328   |
|            | Presence | 198             | 23       |         | 217              | 8        |         |
| LVI        | Absence  | 683             | 79       | 0.005   | 731              | 37       | 0.848   |
|            | Presence | 244             | 49       |         | 279              | 15       |         |
| pN         | 0        | 485             | 63       | 0.275   | 521              | 29       | 0.201   |
|            | 1        | 294             | 40       |         | 322              | 16       |         |
|            | 2        | 107             | 13       |         | 117              | 4        |         |
|            | 3        | 64              | 14       |         | 76               | 2        |         |
| pT         | 1        | 400             | 53       | 0.934   | 432              | 25       | 0.345   |
|            | 2        | 489             | 71       |         | 539              | 24       |         |
|            | 3        | 57              | 3        |         | 60               | 0        |         |
|            | 4        | 15              | 4        |         | 17               | 2        |         |
| Molecular  | Lum A    | 451             | 74       | <0.001  | 489              | 39       | <0.001  |
|            | Lum B    | 264             | 54       |         | 306              | 15       |         |
|            | HER2-OE  | 109             | 3        |         | 112              | 0        |         |
|            | BLBC     | 68              | 0        |         | 68               | 0        |         |
|            | 5NP      | 81              | 3        |         | 84               | 0        |         |
| Age        | Mean     | 54.1            | 58.7     | <0.001  | 54.2             | 63.5     | <0.001  |
|            | SD       | 12.5            | 13.7     |         | 12.6             | 13.2     |         |
|            | Range    | 22-97           | 30-83    |         | 22-97            | 37-83    |         |
| Tumor size | Mean     | 2.68            | 2.68     | 0.491   | 2.68             | 2.48     | 0.558   |
|            | SD       | 1.55            | 1.31     |         | 1.54             | 1.0      |         |
|            | Range    | 0.2-13.9        | 0.8-8.0  |         | 0.2-13.9         | 0.9-4.8  |         |
| Biomarkers |          |                 |          |         |                  |          |         |
| ER         | Neg      | 316             | 9        | <0.001  | 325              | 1        | <0.001  |
|            | Pos      | 659             | 126      |         | 738              | 53       |         |
| PR         | Neg      | 351             | 25       | <0.001  | 369              | 7        | 0.001   |
|            | Pos      | 619             | 110      |         | 688              | 47       |         |
| AR         | Neg      | 584             | 80       | 0.898   | 637              | 32       | 0.929   |
|            | Pos      | 392             | 55       |         | 427              | 22       |         |
| EGFR       | Neg      | 910             | 133      | 0.033   | 995              | 53       | 0.357   |
|            | Pos      | 57              | 2        |         | 58               | 1        |         |
| HER2       | Neg      | 775             | 121      | 0.003   | 848              | 52       | 0.001   |
|            | Pos      | 201             | 13       |         | 214              | 2        |         |
| Ki67       | low      | 587             | 84       | 0.693   | 633              | 40       | 0.037   |
|            | high     | 384             | 51       |         | 424              | 14       |         |

|            |      |     |     |        |      |    |        |
|------------|------|-----|-----|--------|------|----|--------|
| c-KIT      | Neg  | 800 | 124 | 0.008  | 879  | 51 | 0.034  |
|            | Pos  | 165 | 11  |        | 173  | 3  |        |
| P63        | Neg  | 924 | 133 | 0.034  | 1009 | 54 | 0.268  |
|            | Pos  | 43  | 1   |        | 44   | 0  |        |
| CK5/6      | Neg  | 853 | 132 | <0.001 | 938  | 54 | 0.003  |
|            | Pos  | 116 | 2   |        | 118  | 0  |        |
| CK14       | Neg  | 899 | 133 | 0.008  | 986  | 53 | 0.249  |
|            | Pos  | 68  | 2   |        | 69   | 1  |        |
| p-Cadherin | Neg  | 717 | 118 | 0.001  | 788  | 51 | <0.001 |
|            | Pos  | 239 | 16  |        | 254  | 2  |        |
| Vimentin   | Neg  | 818 | 127 | 0.002  | 899  | 51 | 0.101  |
|            | Pos  | 142 | 7   |        | 147  | 3  |        |
| CD44       | Neg  | 312 | 32  | 0.306  | 333  | 15 | 0.197  |
|            | Pos  | 151 | 21  |        | 160  | 12 |        |
| ALDH1      | Neg  | 435 | 50  | 0.782  | 464  | 25 | 0.692  |
|            | Pos  | 31  | 3   |        | 32   | 2  |        |
| SOX2       | Neg  | 375 | 40  | 0.389  | 397  | 22 | 0.855  |
|            | Pos  | 91  | 13  |        | 99   | 5  |        |
| DCLK1      | Low  | 650 | 47  | <0.001 | 687  | 10 | <0.001 |
|            | High | 325 | 88  |        | 365  | 48 |        |

Supplementary Table S4 Cox regression analysis on DFS in IBC-NED

|          | HR    | 95% CI |       | p-value |
|----------|-------|--------|-------|---------|
|          |       | Upper  | Lower |         |
| pN stage | 2.050 | 1.408  | 2.984 | <0.001  |
| DCLK1    | 0.288 | 0.111  | 0.748 | 0.011   |

Factor included in initial step: grade, age, tumor size, LVI, pN, HER2 positivity, Ki67 positivity, ER positivity, PR positivity, focal NED, DCLK1 positivity

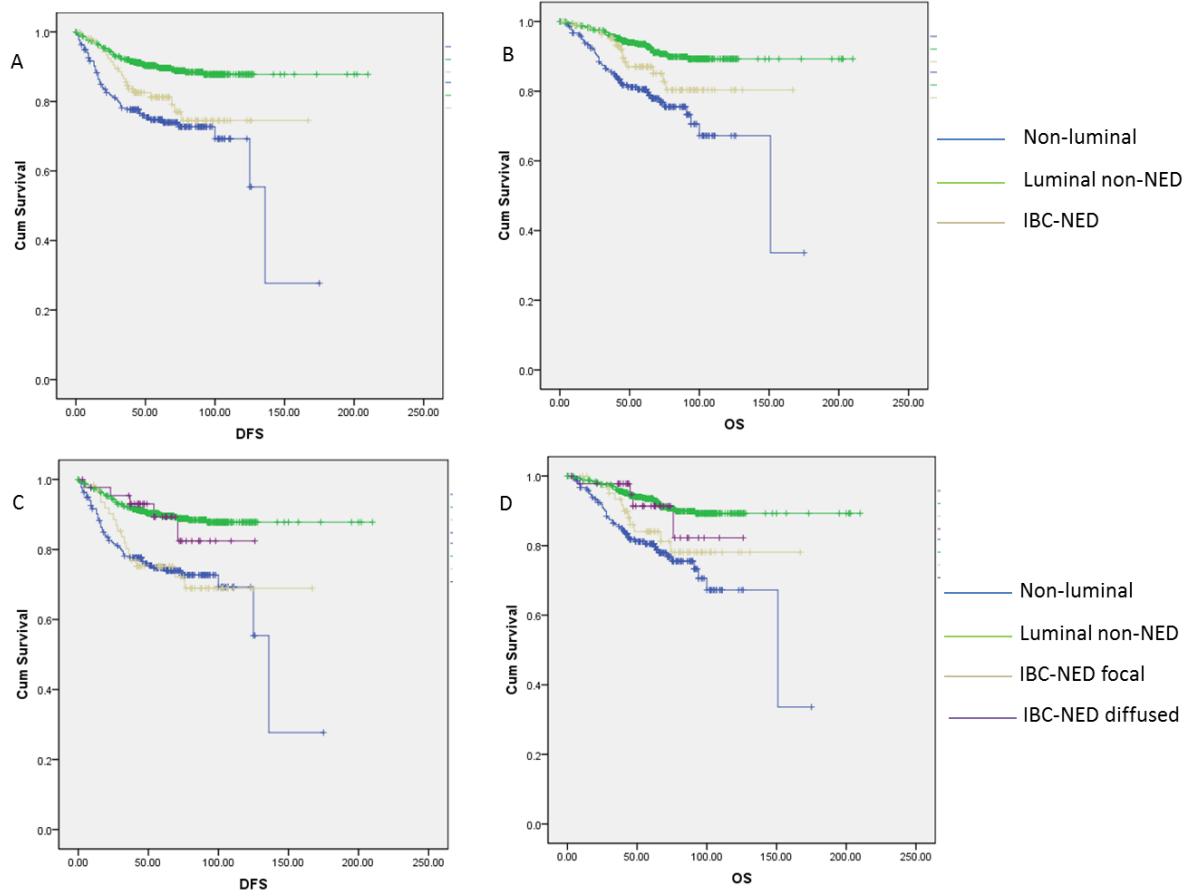

Figure S1: Kaplan-meier analysis on DFS and OS of IBC-NED compared to non-NED luminal and non-luminal cancers
